# Supplementary material
Source: PubMed Central journal article supplement (PMC5013825)
Supplement: NIHMS813668-supplement-1.pdf [file NIHMS813668-supplement-1.pdf]

## Supplemental Information Inventory

The “Supplemental Information” contains the following items:

### Experimental Procedures:

A detailed description of each of the experimental procedures used.

### Figure legends:

The figure legend provides a detailed explanation of each figure.

### Figure S1:

Title: Positive correlation between IDO and CD14 mRNA expression in human melanoma.

Related to Figure 1.

### Figure S2:

Title: Expression of IDO promotes tumor growth and resistance to immune checkpoint blockade.

Related to Figure 2.

### Figure S3:

Title: IDO promotes expansion of myeloid CD11b<sup>+</sup> cells in tumors.

Related to Figure 3.

### Figure S4:

Title: Phenotype and suppressive capabilities of tumor-infiltrating myeloid CD11b<sup>+</sup> cells.

Related to Figure 4.

### Figure S5:

Title: Activation of MDSCs is dependent on IDO expression.

Related to Figure 5.

Figure S6:

Title: Local and systemic effects of tumor IDO expression.

Related to Figure 6.

Figure S7:

Title: Accumulation of MDSCs in tumors is dependent on the adaptive immune response.

Related to Figure 7.
